TITLE:

Community Health Worker Outreach to Assess Confounders of Health

AUTHORS:

Armin Takallou, BS (takallou@ohsu.edu)<sup>1</sup>; Emily Mitchell, MD, MPH

(mitcheem@ohsu.edu)<sup>2</sup>; Gina M. Richardson, MD, MPH (gmrichardson@ucsd.edu)<sup>3</sup>;

Brian Frank, MD (frankb@ohsu.edu)<sup>4</sup>

<sup>1</sup>Oregon Health and Science University, School of Medicine, Portland, OR

<sup>2</sup>Oregon Health and Science University, Department of Internal Medicine, Portland, OR

<sup>3</sup>University of California – San Diego, Department of Pediatrics, San Diego, CA

<sup>4</sup>Oregon Health and Science University, Department of Family Medicine, Portland, OR

## ABSTRACT:

### Title:

Community Health Worker Outreach to Assess Confounders of Health

### Background and Objectives:

In July 2020, recognizing the potential conflict between COVID-19 quarantine guidelines and other medical and social needs, a university-affiliated family medicine clinic developed a workflow to support patients who test positive for COVID-19. The workflow relies on Community Health Workers (CHWs) to call patients, identify needs, and connect them to community resources, with the goal of reducing barriers to maintaining COVID-19 isolation. The objective of this study was to understand the design, implementation, and maintenance of the workflow to provide guidance for other primary care practices interested in developing similar workflows.

### Methods:

This qualitative study was conducted in a federally qualified health center. Key informant interviews were conducted with six personnel involved in the workflow. Using a semi-structured interview guide, interviewers asked participants about the design, implementation, maintenance of the workflow, and benefits and harms. Interviews were analyzed using an immersion-crystallization approach.

### Results:

Across all workflow phases, adaptability and content expertise were reported as essential for workflow success. The main barrier was the lack of coordinated COVID-19-related workflows across the system. Delivery of whole-person care was identified as the primary benefit to both patients and the healthcare system.

### Conclusions:

Interview participants felt that integrating CHWs into the workflow benefitted patients and the clinic. For other practices interested in implementing a similar workflow, themes for success include a workflow framework built on patient-centeredness, adaptability, and the unique content expertise of CHWs.

1  
2  
3  
4  
5  
6  
7  
8  
9  
10  
11  
12  
13  
14  
15  
16  
17  
18  
19  
20  
21  
22  
23

MAIN TEXT:

INTRODUCTION:

COVID-19 has resulted in over one million deaths in the United States since March 2020.[1] Isolating people with COVID-19 and quarantining close contacts has been a strategy to mitigate risk of viral transmission since the beginning of the pandemic. However, the ability to isolate or quarantine is influenced by health-related social needs (HRSN), such as food, childcare, medication, and safe housing.[2,3]

Federally Qualified Health Centers (FQHCs) are community-based clinics that provide primary care services in underserved communities.[4] More than two-thirds of people served by FQHCs are insured by Medicaid or uninsured, and the majority are racial or ethnic minorities, populations with disproportionate levels of unmet HRSNs.[5] Community Health Workers (CHWs) are trusted community members who share language, culture, and other lived experiences. They provide confidential, personalized services that empower individuals and their families to address HRSNs.

The Oregon Health & Science University (OHSU) Family Medicine Clinic at Richmond (FMR) is an FQHC and patient-centered primary care home serving over 16,000 people in and around Portland, OR.[6] In July 2020, FMR staff identified patients facing barriers to COVID-19 quarantine guidelines due to unmet HRSNs and developed a workflow to assist the clinic’s pre-existing “screen and intervene” process for identifying and addressing patients’ HRSNs. In the COVID-19 workflow, CHWs call COVID-19-positive patients and screen them for HRSNs. Patients with HRSNs are connected to community resources. This qualitative study aimed to explore the

24 development, implementation, and maintenance of the workflow, including barriers and  
25 facilitators to each. While this study was specifically in the context of COVID-19, we  
26 believe that the themes discussed are widely applicable to any clinic seeking to find  
27 more information about facilitators and barriers to creating a workflow to address the  
28 HRSNs of their patients.

29

30

### METHODS:

#### Data Collection:

32 Data were gathered through key informant interviews with six FMR employees  
33 directly involved with development, implementation, and maintenance of the workflow: a  
34 behavioral health supervisor (BHS), a social determinants of health coordinator (SDC), a  
35 quality manager (QM), two CHWs (CHW1 and CHW2), and a family nurse practitioner  
36 (FNP). Participants were approached via email, and interviews were conducted via  
37 video conferencing with participants either joining from their workplace or home. No  
38 participants declined participation or withdrew from the study, and data saturation was  
39 not applicable, given that all identified key informants were interviewed. A pilot-tested  
40 semi-structured interview guide covered two domains: 1) barriers and facilitators to the  
41 development, implementation, and maintenance of the workflow and 2) perceived  
42 benefits and harms of the workflow for patients and the healthcare system. A third  
43 domain (framework) was added to encompass foundational principles for the workflow  
44 described during interviews. Interviews lasted 60 minutes. One member of the team  
45 asked questions while another took notes and asked clarifying questions to explore

46 emerging themes. Interviews were audio-recorded, professionally transcribed, and  
47 saved on a secure network for data management and analysis. The clinic was provided  
48 an “impact fee” to compensate for employees’ time. This study was approved by OHSU  
49 IRB# 22571.

50

51 Analysis:

52 *Taguette* was used for qualitative data analysis. The research team analyzed the  
53 data collaboratively using an immersion-crystallization approach and Miller and  
54 Crabtree’s five-phase analysis strategy [Table 1].[7-10] First, interviews were read by all  
55 team members for initial immersion-crystallization, identification of themes, and creation  
56 of a coding template. Next, two team members re-visited and coded each individual  
57 interview. Matrices were then created to display themes and coded text across  
58 interviews for comparative analyses as suggested by Miles and Huberman.[11] Initial  
59 classifications were shared with selected informants to confirm study findings were  
60 reasonable, a qualitative research verification step known as member checking.[12]  
61 Prominent themes were identified and consolidated into outcomes by the team.

62 The research team consisted of students in their dual Doctor of Medicine and  
63 Master of Public Health program and a principal investigator who is a family physician at  
64 FMR. Given that the team engages deeply with both public health training and programs  
65 and clinical medicine, the interpretations of the interviews consider both social  
66 determinants of health and clinical patient experiences.

67

68  
69  
70  
71  
72  
73  
74  
75  
76  
77  
78  
79  
80  
81  
82  
83  
84  
85  
86  
87

RESULTS:

*“...what we were seeing were patients of ours who were testing positive who either were expressing [a need for], or we were finding out later didn't actually have, the basic information or concrete materials to do what we needed them to do, which is: stay home.” – BHS*

During the interviews, prominent themes emerged in the domains described above [Figure 1 and Table 2]. 227 patients screened via the workflow between July 1, 2020 and December 31, 2021. Of these, 39% (n = 89) had one or more HRSN, and information on patient demographics and category of need was collected [Tables 3 and 4].

Framework:

At its core, the workflow was intended to provide patient-centered care to meet patient needs in the context of their whole lives, defined by FNP as:

*“Taking care of the whole person. Not just the person sitting in front of you, the person when they go home and go back to their families. Really making sure that they can successfully stay in their community. 'Cause that's where people thrive.*

As described by SDC,

88            *“[The workflow] was meant to be trauma-informed; it was meant to be person-*  
89            *centered, person-driven. We’ve looked at our screener and thought, ‘Okay.*  
90            *Which things do we need to really make sure that we ask about that would be*  
91            *really relevant for folks that are isolating for two weeks?’”*

92    As with any screening, only actionable data was to be collected. SDC explained this,  
93            *“You have to be able to support the patient in finding what they need. If you’re in*  
94            *a situation where you’re gonna ask someone about, ‘Hey, what do you need to*  
95            *be safe and isolated for two weeks?’ You have to be able to at least support*  
96            *them in trying to find those resources. If that is absolutely not possible, we could*  
97            *potentially be doing more harm to the patient-provider, patient-medical-home*  
98            *relationship by asking that question and not being able to answer it.”*

99

## 100    Barriers and Facilitators:

### 101    *Barrier: Lack of Coordination*

102    The key barrier was a lack of coordination across the healthcare system. In addition to  
103    the FMR-specific workflow, OHSU created a statewide hotline for COVID-19-related  
104    needs. Because the hotline was also tasked with calling COVID-19-positive patients  
105    across the health system, there was frequent overlap with the FMR workflow. Receiving  
106    multiple calls was taxing for patients. BHS recalled,

107            *“It was sometimes irritating to be getting multiple phone calls 'cause patients*  
108            *were getting calls from us, from [the hotline] . . . They were like, ‘I’m sick. Please*  
109            *stop calling me.’”*



110 The hotline dealt with a large volume of calls which prohibited provision of individualized  
111 assistance. Though understandable, this was seen as a barrier to effective resource  
112 navigation by patients. SDC recalled,

113 *“they weren’t doing it in . . . a person-centered way and driven by the patient. I*  
114 *think getting a 10-page MyChart message about all the food pantries around*  
115 *Portland is not very helpful.”*

116

117 *Facilitator: Adaptability*

118 The workflow team was described by members as small and nimble, able to respond  
119 quickly to the pandemic’s ever-changing landscape. This adaptability facilitated all  
120 aspects of the workflow. As mentioned by BHS,

121 *“I remember . . . some things very early on that we kept fine-tuning, which is*  
122 *another really nice thing about the local control of it . . . that we could make those*  
123 *changes instantly.”*

124 SDC commented,

125 *“I would check in with the [CHWs] every couple of weeks and say, ‘Okay. How*  
126 *are things going?’ ‘What things are challenging?’ ‘What things do we need to*  
127 *change?’ Just being able to have that touchpoint and ability to either help adapt*  
128 *the program, or address whatever thing is coming up with other folks in*  
129 *leadership.”*

130 The term “pivot” was used frequently. When describing patient outreach, CHW2 said,

131           *“You have to be able to pivot quickly based on what needs there are. We've*  
132           *developed a [template] with a little bit of scripting, but as soon as you start real*  
133           *life application of it, you have to be able to go off that script.”*

134   As further evidence of the team's adaptability, several respondents mentioned that, as  
135   cases waned and a need for vaccination outreach emerged, the team was able to  
136   refocus their efforts quickly.

137

138   *Facilitator: Content Expertise*

139   Another key facilitator to the workflow was the unique content expertise of CHWs, which  
140   is informed by lived experience, shared community culture, and a deep knowledge of  
141   local resources. As BHS explained,

142           *“[CHWs] are, in the best case, from the community, experts in community*  
143           *resources, experts in system navigation, and they are by design non-*  
144           *medicalized, so they're not gonna be caught up in the medical piece of it. They*  
145           *are going to be your experts in community . . . They are the content experts.*

146   Similarly, SDC commented,

147           *“They have not only the expertise, but the lived experience to be able to*  
148           *understand what things you may need to think about when you're considering*  
149           *different barriers. I mean, community health work is really that lens that they*  
150           *bring that was necessary to understand how to approach this [social needs]*  
151           *assessment.”*

152 This point was driven home by CHW1:

153 *“[The patients] were predominantly people of color who spoke other languages.*  
154 *Using interpreters and other things of that sort could have been challenging for*  
155 *people actually receiving that information. That may not have been translated*  
156 *correctly or people may not have even gotten a phone call.”*

157

158 *Barrier and Facilitator: The Role of Data*

159 The electronic health record (EHR) emerged as both a barrier and a facilitator to the  
160 workflow. Early on, SDC recalled,

161 *“The process of how we got the information of who was COVID-positive was*  
162 *such a pain when it first began. I remember our previous practice manager had*  
163 *to go back through her emails over the last couple of weeks and just forward us*  
164 *emails of patient notifications of testing positive. That was a barrier. We were*  
165 *dependent on someone else; it was potentially disrupted by human error.”*

166 Over time, however, the team adapted. In QM's words,

167 *“We use a lot of data to inform many internal monitoring efforts. It didn't really*  
168 *feel or seem like anything new, it was just like, oh, okay, we just need to work to*  
169 *understand the need. What are we trying to accomplish, and then, what's the*  
170 *best source of data and ways of publishing it?”*

171 An additional benefit was the ease of communicating patients' needs to others.

172 According to FNP,

173            *“Within our electronic health record, we can send messages. I would route the*  
174            *chart to whoever it needed to be routed to and then that person would . . . usually*  
175            *respond directly to me and say, okay, we'll call them at this point in time. I would*  
176            *say they would benefit from assistance with X, Y, and Z things. They say, okay,*  
177            *we'll help take care of it.”*

178    The ease of this communication reduced barriers to tracking patient outreach for both  
179    clinical and non-clinical staff.

180

### 181    Benefits of the Workflow:

#### 182    *Benefits to the Healthcare System*

183    The immediate perceived benefit of this workflow was that it improved the ability of  
184    COVID-19-positive patient to safely isolate, thereby reducing viral transmission. CHW1  
185    observed,

186            *“if I'm being told I need to stay home and isolate, but I don't have any food, I don't*  
187            *have any access to go and get my medications or I desperately need to work to*  
188            *keep the lights on. Unless if I have someone doing this work and reaching out to*  
189            *me, chances are I'm gonna go back to work and I'm gonna . . . transmit it to other*  
190            *people.”*

191    Additionally, participants felt the workflow provided a team-based approach to  
192    addressing social needs that reduced clinician burden and improved patient-centered  
193    care. SDC noted,

194 *“This workflow, just like a lot of other workflows that are meant to front-load*  
195 *barrier reduction, it takes the onus off of, for example, the provider or the nurse*  
196 *that is having that conversation with a COVID-positive patient to have to worry*  
197 *about these pieces. The clinicians can trust the fact that we got all of the data on*  
198 *the patients that were screened positive and did the outreach to them.”*

### 199 *Benefits to the Patient*

200 The most important perceived benefit of the workflow to patients was its ability to  
201 address patients’ HRSN rather than simply focusing on medical care. This was seen as  
202 a contrast with traditional medical care. SDH noted,

203 *“We tend to be pretty prescriptive in what we want you to do as the patient. You*  
204 *know, ‘You are gonna take this medicine so your diabetes gets better,’ not, ‘What*  
205 *do you think that you need to do to make your diabetes better? What thing do*  
206 *you wanna focus on that might help? Is it finding food? That’s great. We can help*  
207 *you with that, rather than, “Here’s the pill . . . take the pill and go, and it’ll get*  
208 *better.”*

209 FNP related a specific example:

210 *“I think of this couple that I saw, two Spanish speaking patients that had COVID. I*  
211 *was able to ask them, ‘What do you need to be successful to do this? What do*  
212 *you need to stay healthy?’ Being able to offer this menu of options and say,*  
213 *‘Someone’s gonna reach out to you in your own language to get you the food, get*  
214 *you the medicines, get you all the things they need.’ They had food for maybe 24*

215 *hours. It's so easy to be like, 'Okay, go home. Good luck.' That's not what our*  
216 *patients need 'cause they will get sick and they will die because of those things.'*

217  
218 Because it takes a patient-centered approach, another perceived benefit of the workflow  
219 was its potential to reshape patients' relationship with the medical system. Participants  
220 shared a belief that this relationship has eroded, especially among marginalized  
221 communities. Restoring trust among patients, they reasoned, is needed to reduce  
222 health disparities. BHS summed this up, saying,

223 *"If our goal is to help people be healthier, live better lives, to heal our*  
224 *communities, then we can't just keep saying, 'Take this medication. Go get this*  
225 *test done. It doesn't matter if you don't have transportation. It doesn't matter if*  
226 *you don't have a refrigerator for your insulin. That's not our business.' We can*  
227 *keep doing that, and we'll continue to have huge inequities in health, we'll*  
228 *continue to have poor health outcomes and continue to lose trust . . . there has to*  
229 *be trust in these relationships if we actually wanna create any change."*

230 Participants saw CHWs as critical to this process. According to BHS,

231 *"[CHWs] already come from a restorative relationship-based lens rather than a*  
232 *just like, 'Here's a list of resources.' Any cat can do that. They have very specific*  
233 *restorative and relationship-building lenses which I think made [the workflow]*  
234 *much easier and more successful."*

235 BHS added,

236 *“I think [this work] has to be prioritized by the system, the same way that nursing*  
237 *care is prioritized and physician and provider care is prioritized. I think it's a cop-*  
238 *out to say, ‘Oh, well, that's too expensive.’“*

239

240 DISCUSSION:

241 The COVID pandemic exploited weaknesses in partnerships between medical  
242 systems, public health authorities, and communities. In many states, CHWs were  
243 deployed to bridge these gaps because of their unique ability to form trusted community  
244 relationships. Three years later, the pandemic is transitioning to a recovery phase.  
245 Long-term effects of the virus on individuals and society are not yet known, but  
246 socioeconomic needs remain high, especially among low-income and marginalized  
247 communities. Health systems are exploring ways to screen for and address HRSN  
248 among their patients.

249 The use of standardized screening tools for HRSN is increasing, and many  
250 health systems have hired case managers to provide health systems and social service  
251 navigation to improve health outcomes and reduce cost drivers such as hospital  
252 readmission and emergency department utilization. Some states have also explored  
253 ways of reimbursing these services, including capitated payment arrangements or direct  
254 reimbursement of traditional health workers (a category that includes CHWs). Studies  
255 are emerging to ensure that, given the often sensitive and personal nature of the  
256 questioning, HRSN screening is patient-centered.[13]

257

258           This study examines facilitators and barriers to providing outreach, HRSN  
259 screening, and resource navigation to patients at a federally qualified health center. We  
260 found that involving CHWs throughout the design, implementation, and maintenance  
261 processes benefited both patients and the clinic. In particular, the adaptability of the  
262 workflow, and the team that deployed it, paired with the content expertise of the CHWs,  
263 was seen as instrumental to its success. Lastly, it was crucial that the workflow's  
264 framework valued whole-person care, accomplished mainly by integrating CHWs'  
265 perspectives and considering patients' lived experiences.

266

267 Limitations:

268           This qualitative study was conducted at a single FQHC in an urban setting that  
269 had already integrated CHWs into other clinic processes, simplifying the transition to  
270 this workflow. The needs and experiences of other clinics and patient populations may  
271 vary. We also did not evaluate patients' perspective of the service. It is possible that  
272 patients did not perceive its benefit in the same way as clinic staff. Lastly, the workflow  
273 was implemented with people attempting to isolate at home when many in-person  
274 resources were unavailable. Returning to more traditional operations may obviate much  
275 of the need for this type of workflow. Further evaluation is needed to learn whether our  
276 findings are broadly reproducible and whether fidelity to our workflow improves its  
277 adoption and maintenance.

278

279 Conclusion:



280           We believe that many clinics, especially those serving low-income and  
281   marginalized populations, will be interested in implementing similar workflows. Our  
282   findings can guide these clinics, helping them navigate systemic challenges and avoid  
283   potential pitfalls.

284

285   Acknowledgments:

286           The authors wish to acknowledge the contributions of the staff, faculty, and  
287   leadership of Oregon Health & Science University's Family Medicine Clinic at  
288   Richmond.

## REFERENCES:

1. Centers for Disease Control and Prevention. COVID Data Tracker. Accessed December 13, 2022. <https://covid.cdc.gov/covid-data-tracker>
2. Omaleki V, Vo AV, Flores M, et al. "It's hard for everyone" systemic barriers to home confinement to prevent community spread of COVID-19. *Transl Behav Med.* 2022;ibac074. doi:10.1093/tbm/ibac074
3. NeJhaddadgar N, Toghroli R, Yoosefi Lebni J, A Melca I, Ziapour A. Exploring the Barriers in Maintaining the Health Guidelines Amid the COVID-19 Pandemic: A Qualitative Study Approach. *Inquiry.* 2022;59:469580221100348. doi:10.1177/00469580221100348
4. Health Resources & Services Administration. Health Center Program Award Recipients. Accessed December 13, 2020. <https://www.hrsa.gov/opa/eligibility-and-registration/health-centers/fqhc>.
5. National Association of Community Health Centers. Community Health Center Chartbook 2022. Accessed December 13, 2020. <https://www.nachc.org/research-and-data/research-fact-sheets-and-infographics/2021-community-health-center-chartbook/>.
6. Oregon Health Authority. Oregon Health Authority Patient-Centered Primary Care Home Program: 2020 Recognition Criteria Technical Specifications and Reporting Guide. Accessed on Feb 12, 2023.

<https://www.oregon.gov/oha/HPA/dsi-pcpch/Documents/2020-PCPCH-TA-Guide.pdf>.

7. Glaser B, Strauss A. *The Discovery of Grounded Theory: Strategies for Qualitative Research*. Sociology Press; 1967.
8. Strauss A, Corbin J. *Basics of Qualitative Research: Techniques and Procedures for Developing Grounded Theory, 2nd ed.* Sage; 1998.
9. Charmaz K. Grounded theory methods in social justice research. *Handb Qual Res*. 2011;(April):359-380.
10. Crabtree BF, Miller WL. *Doing Qualitative Research 2nd ed.* SAGE; 1999.
11. Miles MB, Huberman AM. *Qualitative Data Analysis: An Expanded Sourcebook, 2nd ed.* Sage; 1994.
12. Malterud K. Qualitative research: standards, challenges, and guidelines. *Lancet*. 2001;358(9280):483-488. doi:10.1016/S0140-6736(01)05627-6
13. Steeves-Reece AL, Nicolaidis C, Richardson DM, et al. "It Made Me Feel like Things Are Starting to Change in Society:" A Qualitative Study to Foster Positive Patient Experiences during Phone-Based Social Needs Interventions. *Int J Environ Res Public Health*. 2022;19(19):12668. Published 2022 Oct 3. doi:10.3390/ijerph191912668

TABLES:

**Table 1: Five-Phase Data Analysis Process**

|                                                                                                                                                                                                                                                                                                                                                                                                                                                                                                                                                                                                                                                                                                                                                                                         |
|-----------------------------------------------------------------------------------------------------------------------------------------------------------------------------------------------------------------------------------------------------------------------------------------------------------------------------------------------------------------------------------------------------------------------------------------------------------------------------------------------------------------------------------------------------------------------------------------------------------------------------------------------------------------------------------------------------------------------------------------------------------------------------------------|
| <ol style="list-style-type: none"> <li>1. <b><u>Describing</u></b>: First immersion-crystallization process: data initial read (immersion) to identify overarching pattern for organizing the data (crystallization).</li> <li>2. <b><u>Organizing</u></b>: A coding template will be created to organize data and structure the subsequent analysis.□</li> <li>3. <b><u>Connecting</u></b>: Second immersion-crystallization cycle: coded text analyzed to identify cross-cutting patterns.</li> <li>4. <b><u>Corroborating/legitimizing</u></b>: We will seek additional data to confirm/disconfirm or refute insights.</li> <li>5. <b><u>Representing the account</u></b>: We will identify ways of sharing interpretations that are meaningful for the target audiences.</li> </ol> |
|-----------------------------------------------------------------------------------------------------------------------------------------------------------------------------------------------------------------------------------------------------------------------------------------------------------------------------------------------------------------------------------------------------------------------------------------------------------------------------------------------------------------------------------------------------------------------------------------------------------------------------------------------------------------------------------------------------------------------------------------------------------------------------------------|

**Table 2.** Main themes within each domain.

|                             |                                                                                                |                                                                                                               |
|-----------------------------|------------------------------------------------------------------------------------------------|---------------------------------------------------------------------------------------------------------------|
| <b>Framework</b>            | Patient-centered, whole-person care                                                            |                                                                                                               |
|                             | <b>Facilitators</b>                                                                            | <b>Barriers</b>                                                                                               |
| <b>Design</b>               | adaptability, content expertise, funding                                                       | data, patient/system relationship, environmental unpredictability, and lack of coordination across the system |
| <b>Implementation</b>       | adaptability, clear communication, and data                                                    | lack of coordination across the system and the patient/system relationship                                    |
| <b>Maintenance</b>          | adaptability, content expertise, and funding                                                   | staff bandwidth, funding, and lack of coordination across the system                                          |
|                             | <b>Benefits</b>                                                                                | <b>Harms</b>                                                                                                  |
| <b>Impact on the System</b> | whole person care, the patient/system relationship, and lack of coordination across the system | patient/system relationship, better outcomes, and decreased healthcare costs                                  |

**Table 3: Race and ethnicity of patients who screened positive for one or more medical or social needs during workflow outreach.**

| Race             |  | N  | Percent | Ethnicity    |    | N      | Percent |
|------------------|--|----|---------|--------------|----|--------|---------|
| AIAN             |  | 3  | 3.4%    | Non-Hispanic | 66 | 74.2%  |         |
| Asian            |  | 5  | 5.6%    | Hispanic     | 12 | 13.5%  |         |
| Black            |  | 16 | 18.0%   | Declined     | 6  | 6.7%   |         |
| Multiracial      |  | 1  | 1.1%    | Unknown      | 5  | 5.6%   |         |
| Pacific Islander |  | 1  | 1.1%    | Total        | 89 | 100.0% |         |
| White            |  | 59 | 66.3%   |              |    |        |         |
| Declined         |  | 3  | 3.4%    |              |    |        |         |
| Unknown          |  | 1  | 1.1%    |              |    |        |         |
| Total            |  | 89 | 100.0%  |              |    |        |         |

**Table 4: Medical and social needs of patients who screened positive for one or more needs during workflow outreach.**

| Resource         | Number of instances of need* |
|------------------|------------------------------|
| Income/Financial | 128                          |
| Food             | 58                           |
| Housing          | 47                           |
| Mental health    | 6                            |
| Medical          | 8                            |
| Childcare        | 8                            |
| Supplies         | 4                            |
| Other            | 5                            |
| Unspecified      | 21                           |
| Total            | 285                          |

\*Some patients endorsed more than one need

# Prominent Themes Derived Across Semi-Structured Interview Topics

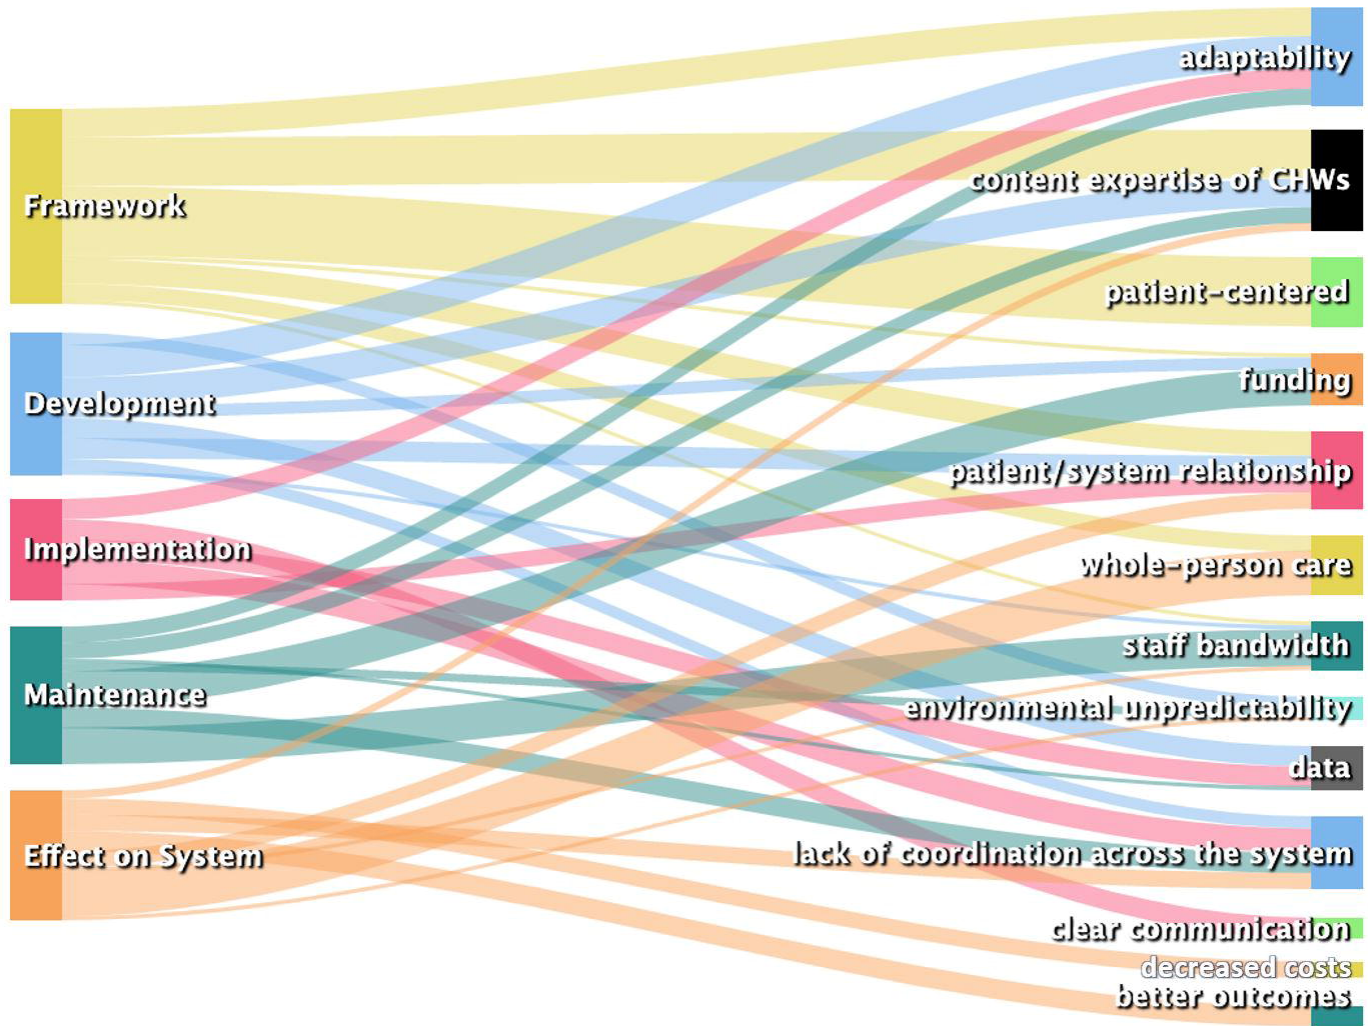

**Figure 1.** When interviewing six key personnel involved in the workflow using semi-structured interview topics (left), prominent and overlapping themes (right) emerged across these topics.
